# Supplementary material
Source: publisher figshare collection journal article supplement (https://acs.figshare.com/ndownloader/files/4098850)
Supplement: Supplementary file 1 [file 4098850]

## Supporting Information

### Sensitive Nanochannel Biosensor for T4 Polynucleotide Kinase Activity and Inhibition Detection

Lei Lin, Yang Liu, Jing Yan, Xingsheng Wang, Jinghong Li\*

Department of Chemistry, Beijing Key Laboratory for Analytical  
Methods and Instrumentation, Tsinghua University, Beijing 100084,  
China.

#### 1. Schematic Image of Current Measurement.

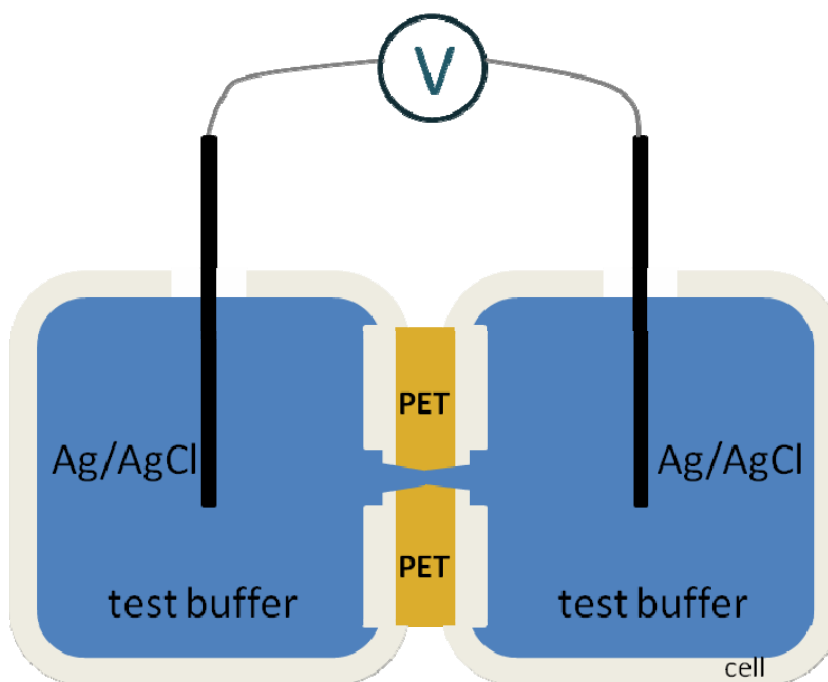

**Scheme S1.** Schematic image of nanoporous PET membrane (12  $\mu\text{m}$  thick, with ion track of  $10^6/\text{cm}^2$ ) and the cell used for current measurement.

## 2. Characterization of Chemically Etched PET Membrane.

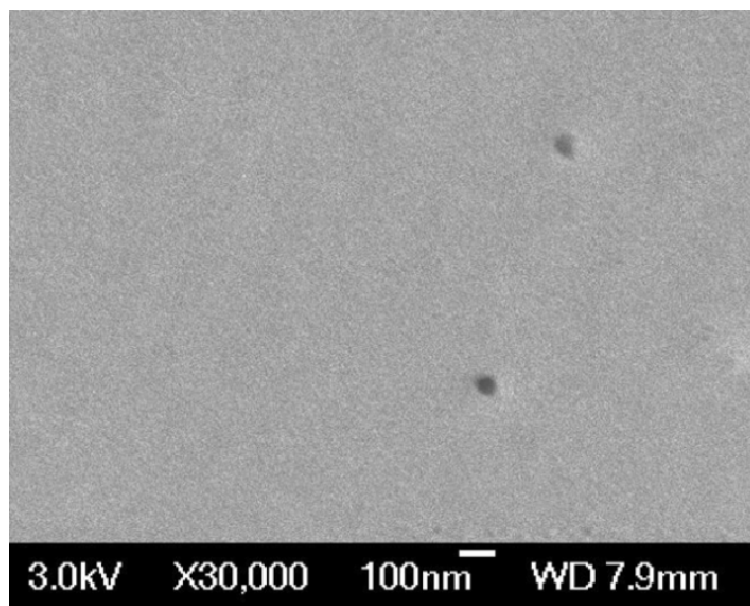

**Figure S1.** SEM image of PET membrane after UV light exposure and chemical etching.

## 3. Characterization of Streptavidin-Modified Nanochannel.

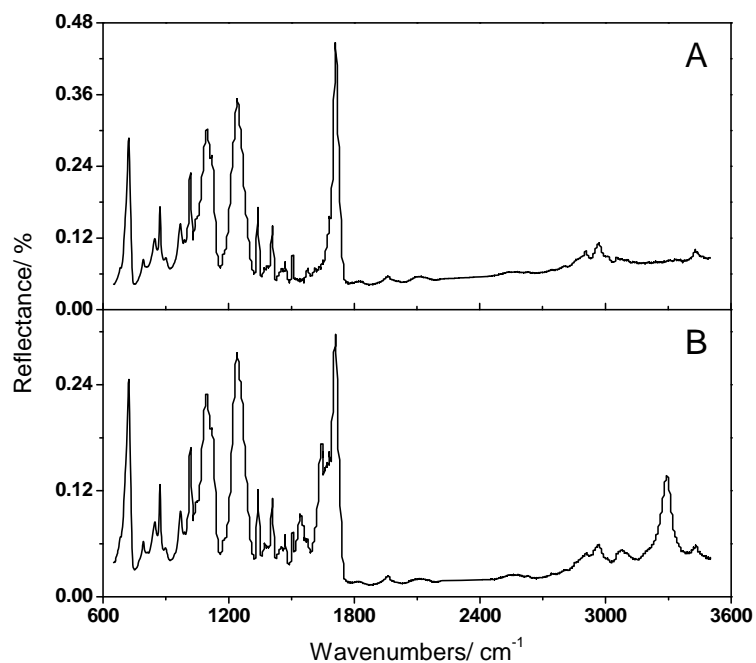

**Figure S2.** ATR-FTIR spectra of (A) bare and (B) streptavidin-modified PET membrane.

### 3. Affinity Binding between Biotin-dsDNA and Streptavidin-Modified Nanochannel.

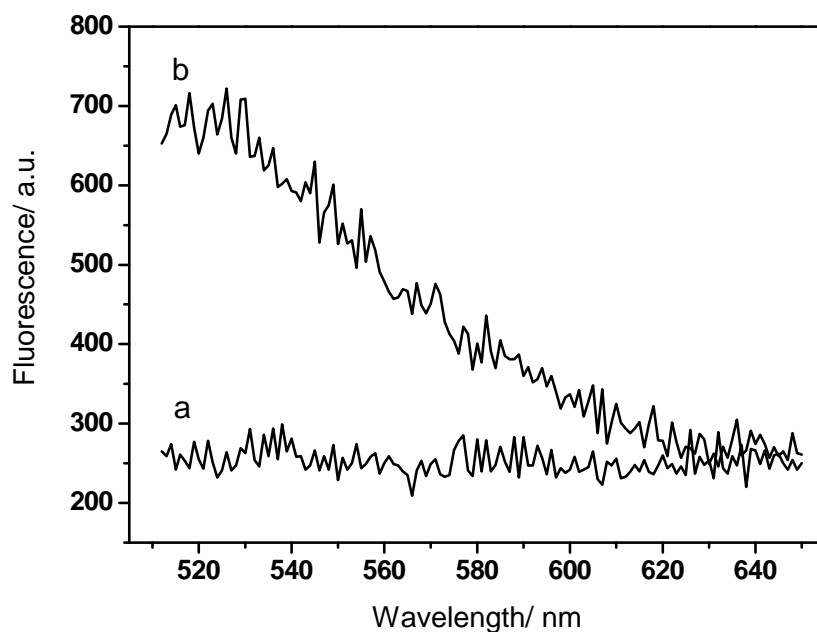

**Figure S3.** Fluorescence spectra of the streptavidin-modified PET film binding (a) without and (b) with FAM labeled biotin-dsDNA.

### 4. Optimization of the Pore-blocking Effect Induced by Biotin-dsDNA.

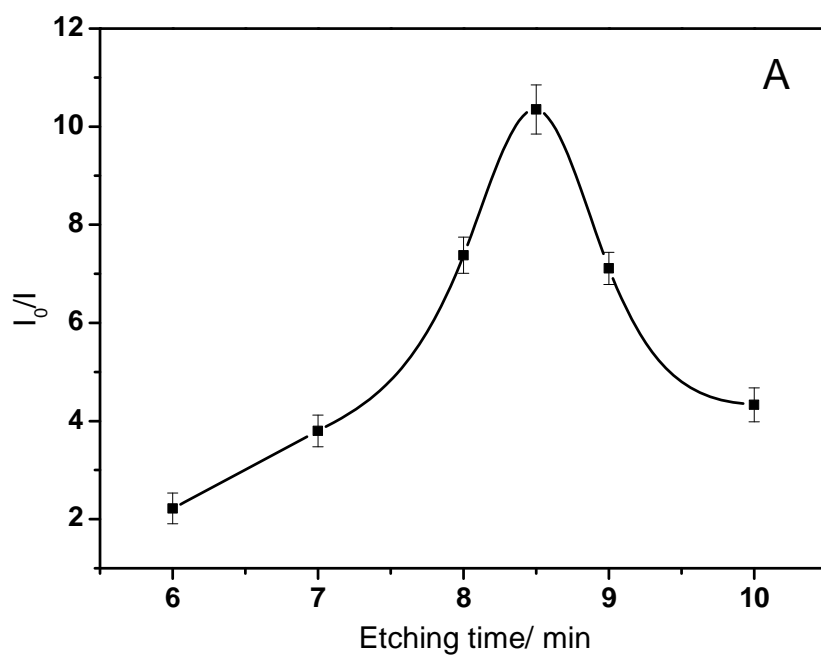

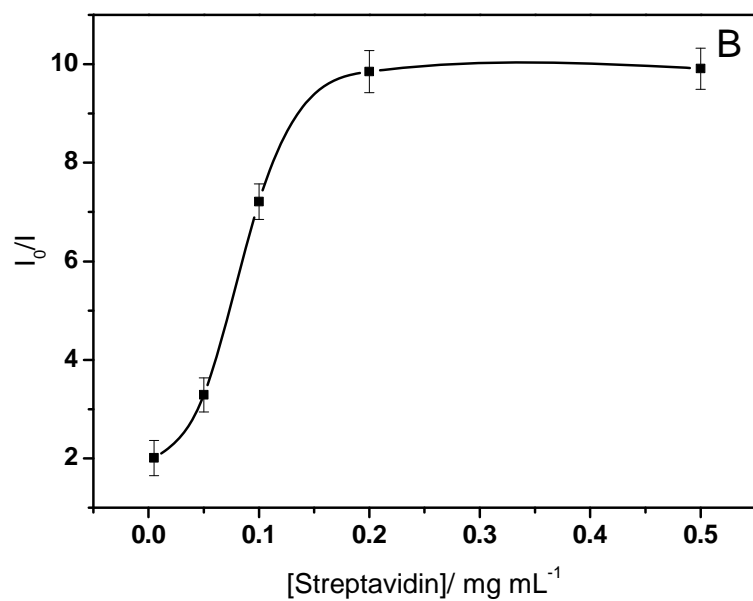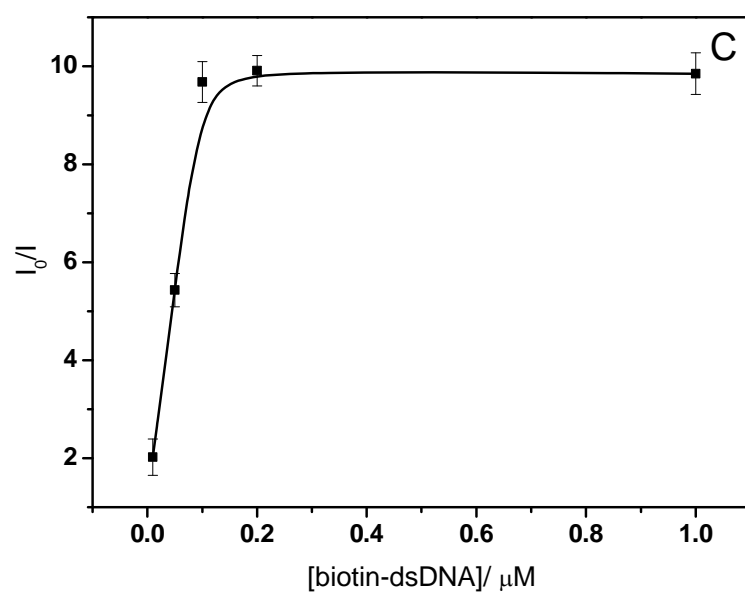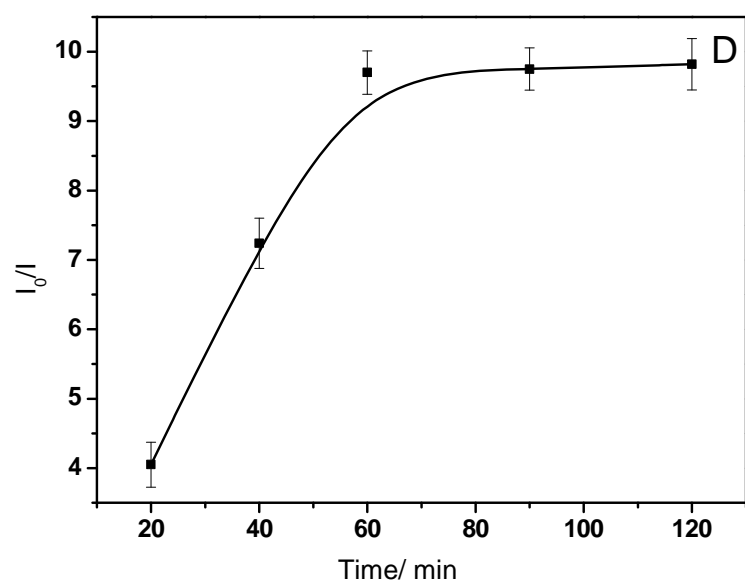

**Figure S4.** Optimization of (A) chemical etching time, (B) concentration of streptavidin used for channel modification, (C) biotin-dsDNA concentration and (D) affinity interaction time.

### 5. Optimization of Phosphorylation Assay Conditions.

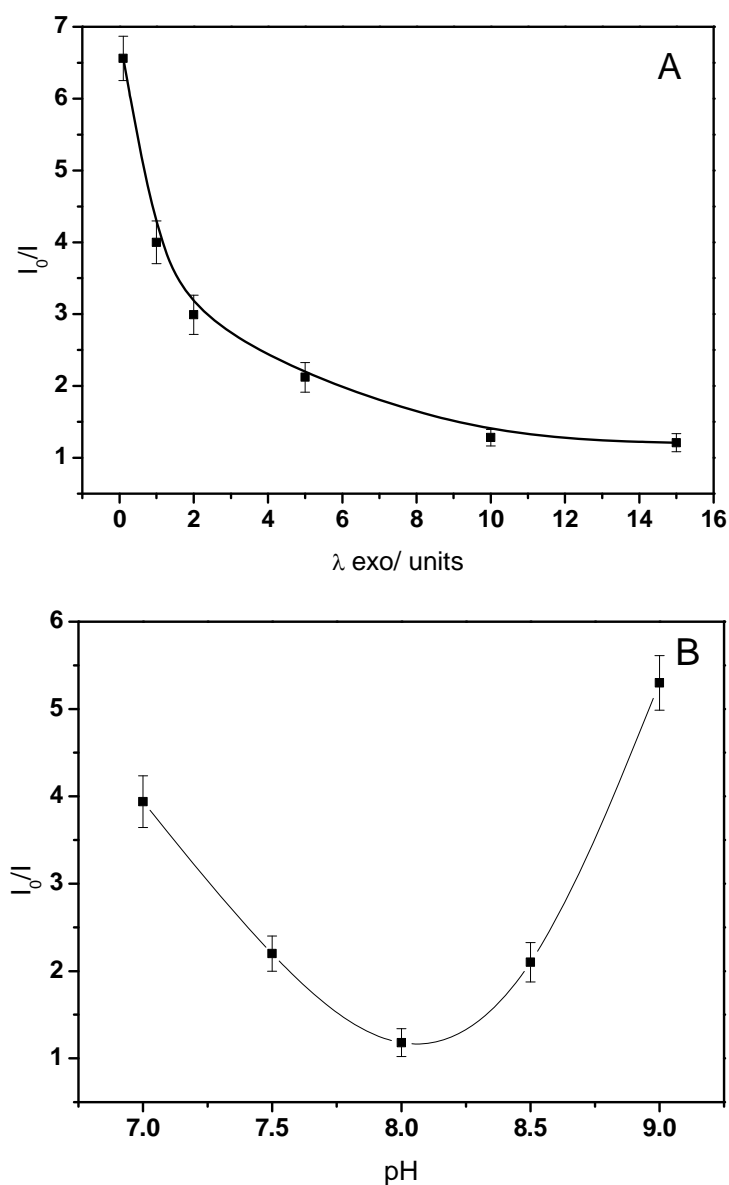

**Figure S5.** Optimization of (A)  $\lambda \text{ exo}$  concentration and (B) pH of the reaction buffer. The concentrations of biotin-dsDNA, PNK, ATP were  $0.1 \mu\text{M}$ ,  $5 \text{ units mL}^{-1}$  and  $0.5 \text{ mM}$ , respectively
